# Supplementary material
Source: publisher figshare collection journal article supplement (https://asha.figshare.com/articles/dataset/_/28200074)

**Supplemental Material S3.** Individual child performance on unique number of target and control words produced during the baseline and treatment phases. Parenthetical information (e.g., “action”) indicates which treatment condition the child was in. Responders as per the *d*-score criteria have asterisks (\*). Children are grouped first by responders (per MCDI growth rate), and then nonresponders.

**Responders**, according to MCDI growth rate:

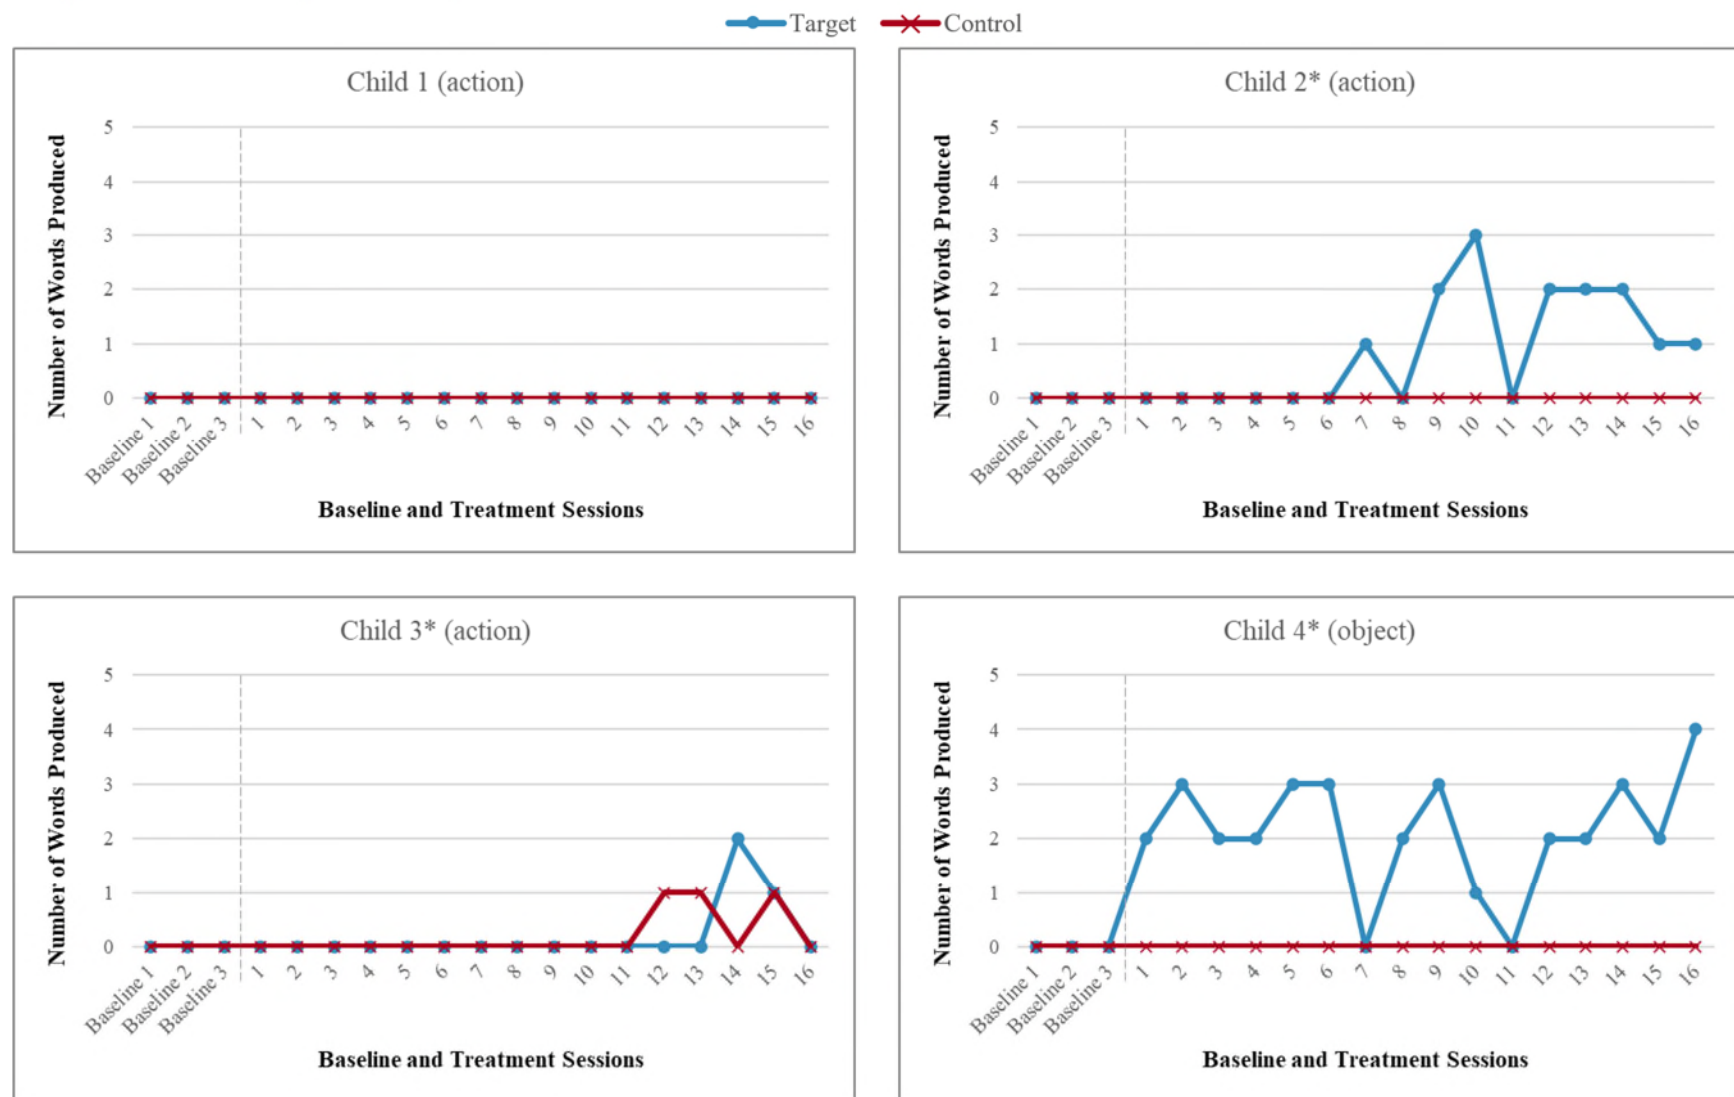

## Responders, continued:

—●— Target —×— Control

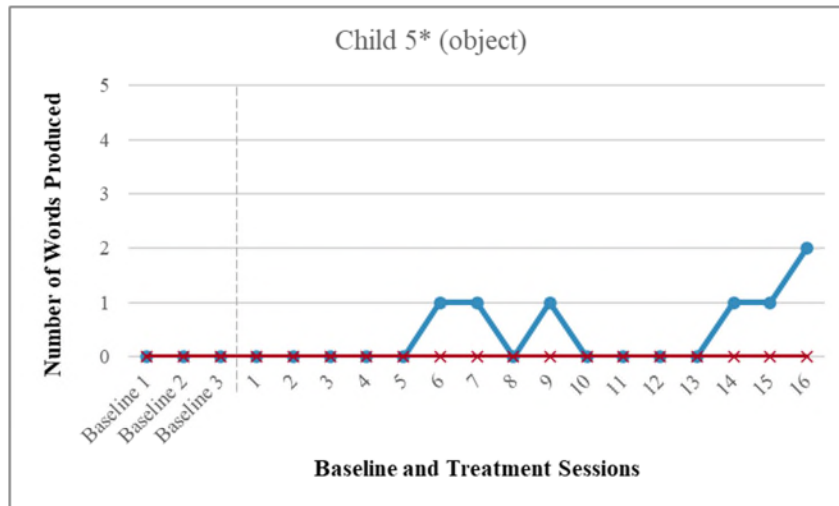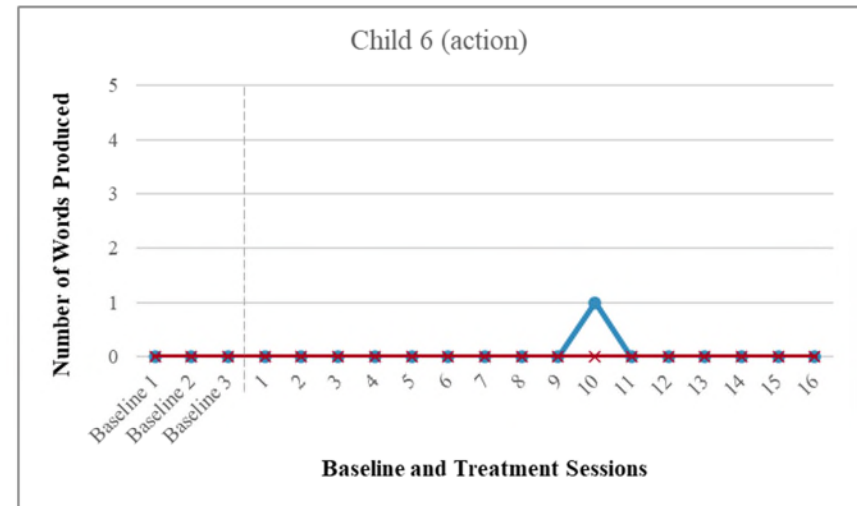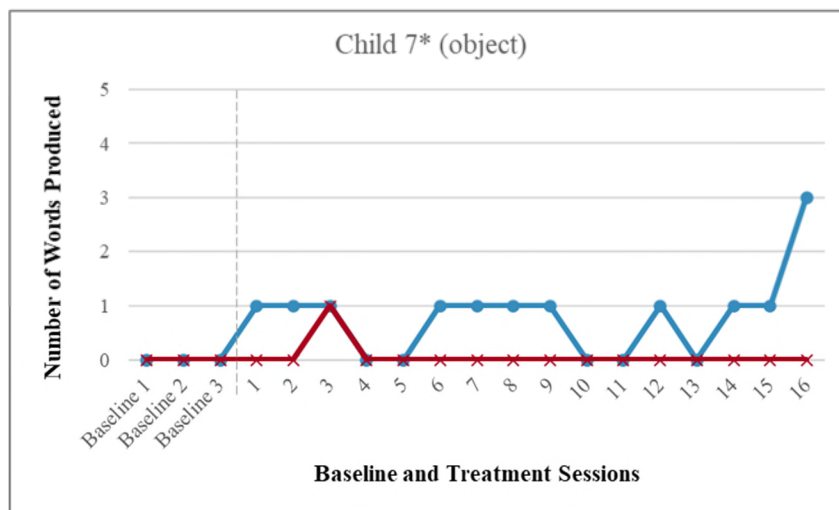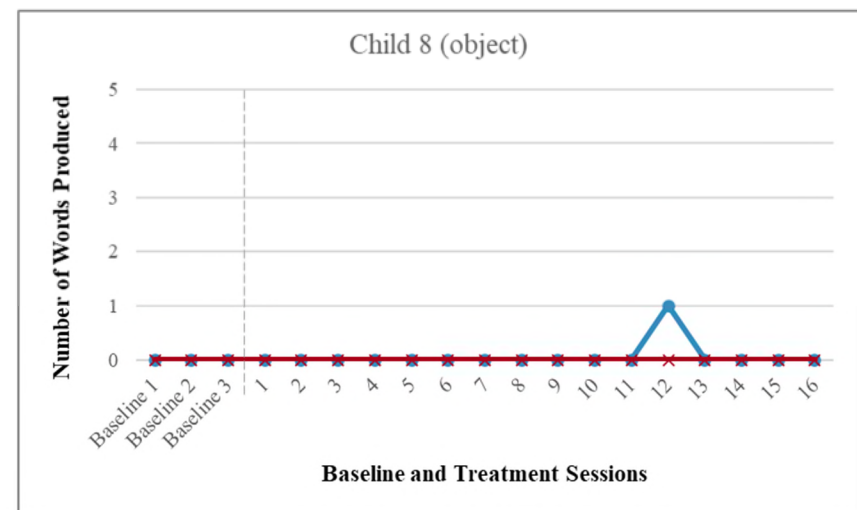

## Responders, continued:

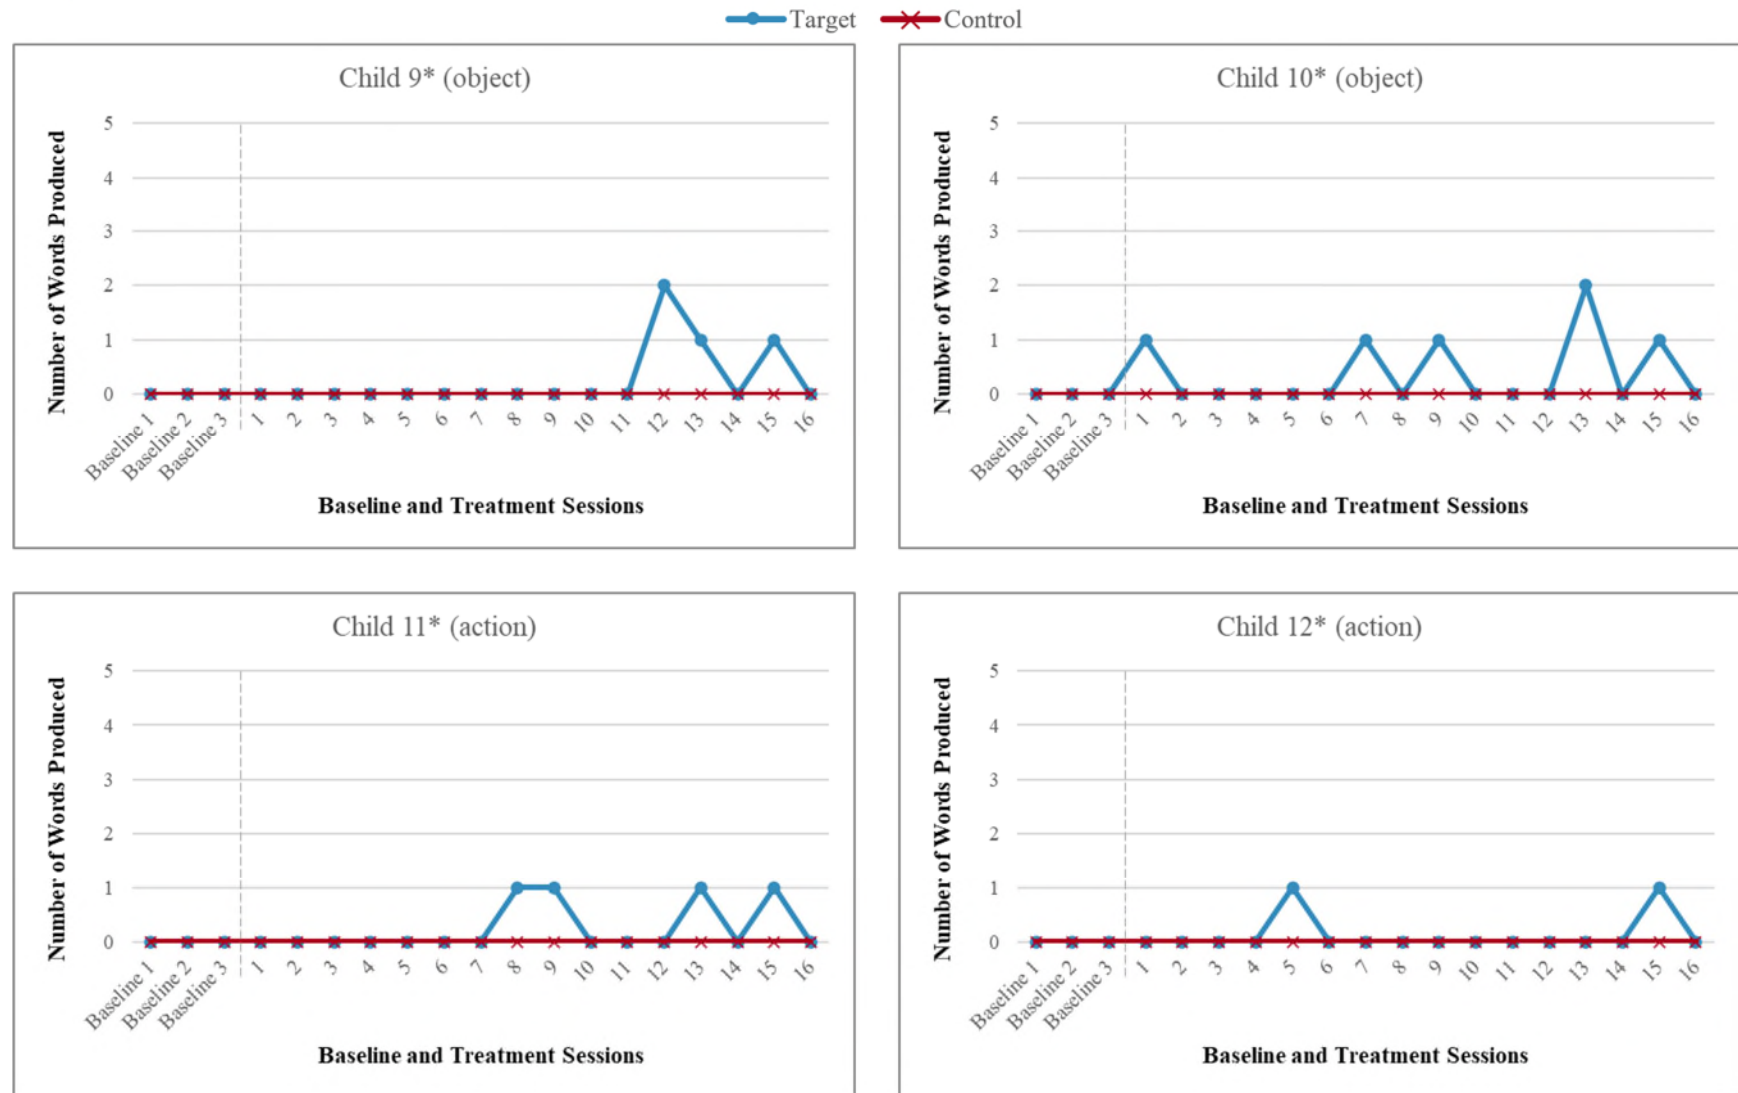

## Responders, continued:

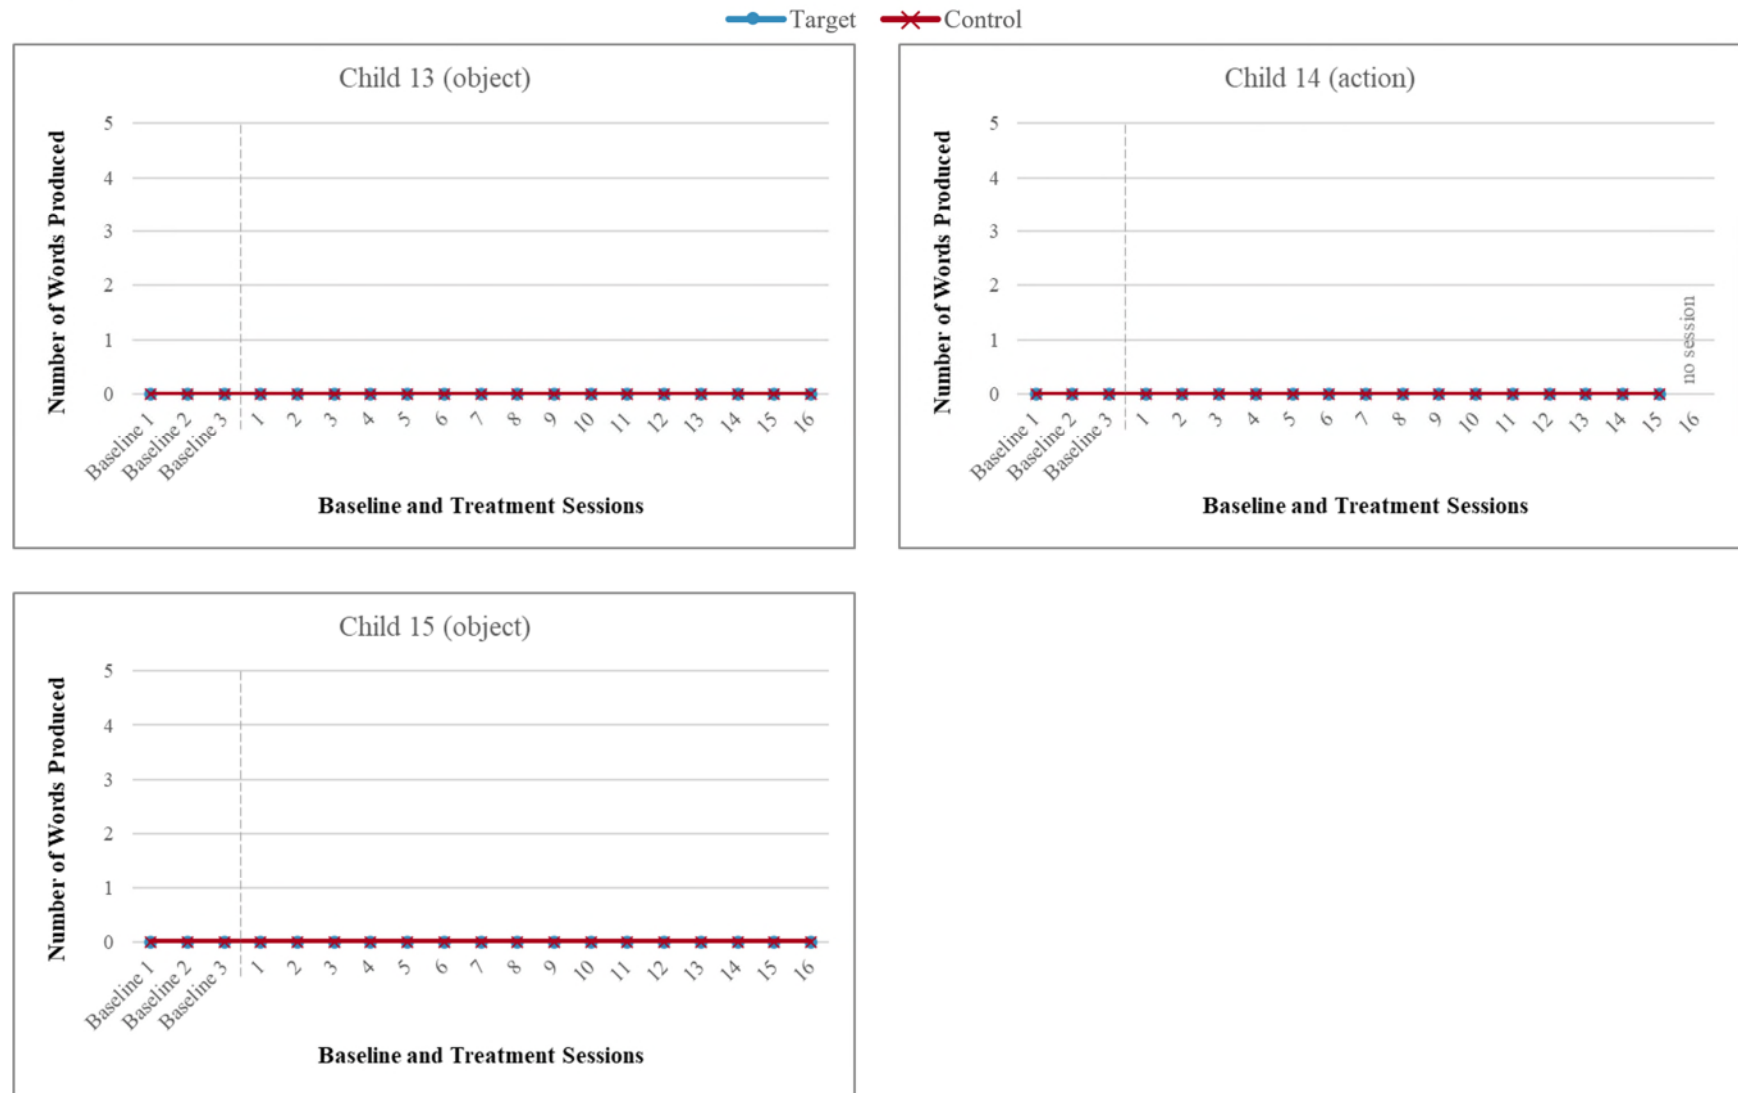

**Nonresponders**, according to MCDI growth rate:

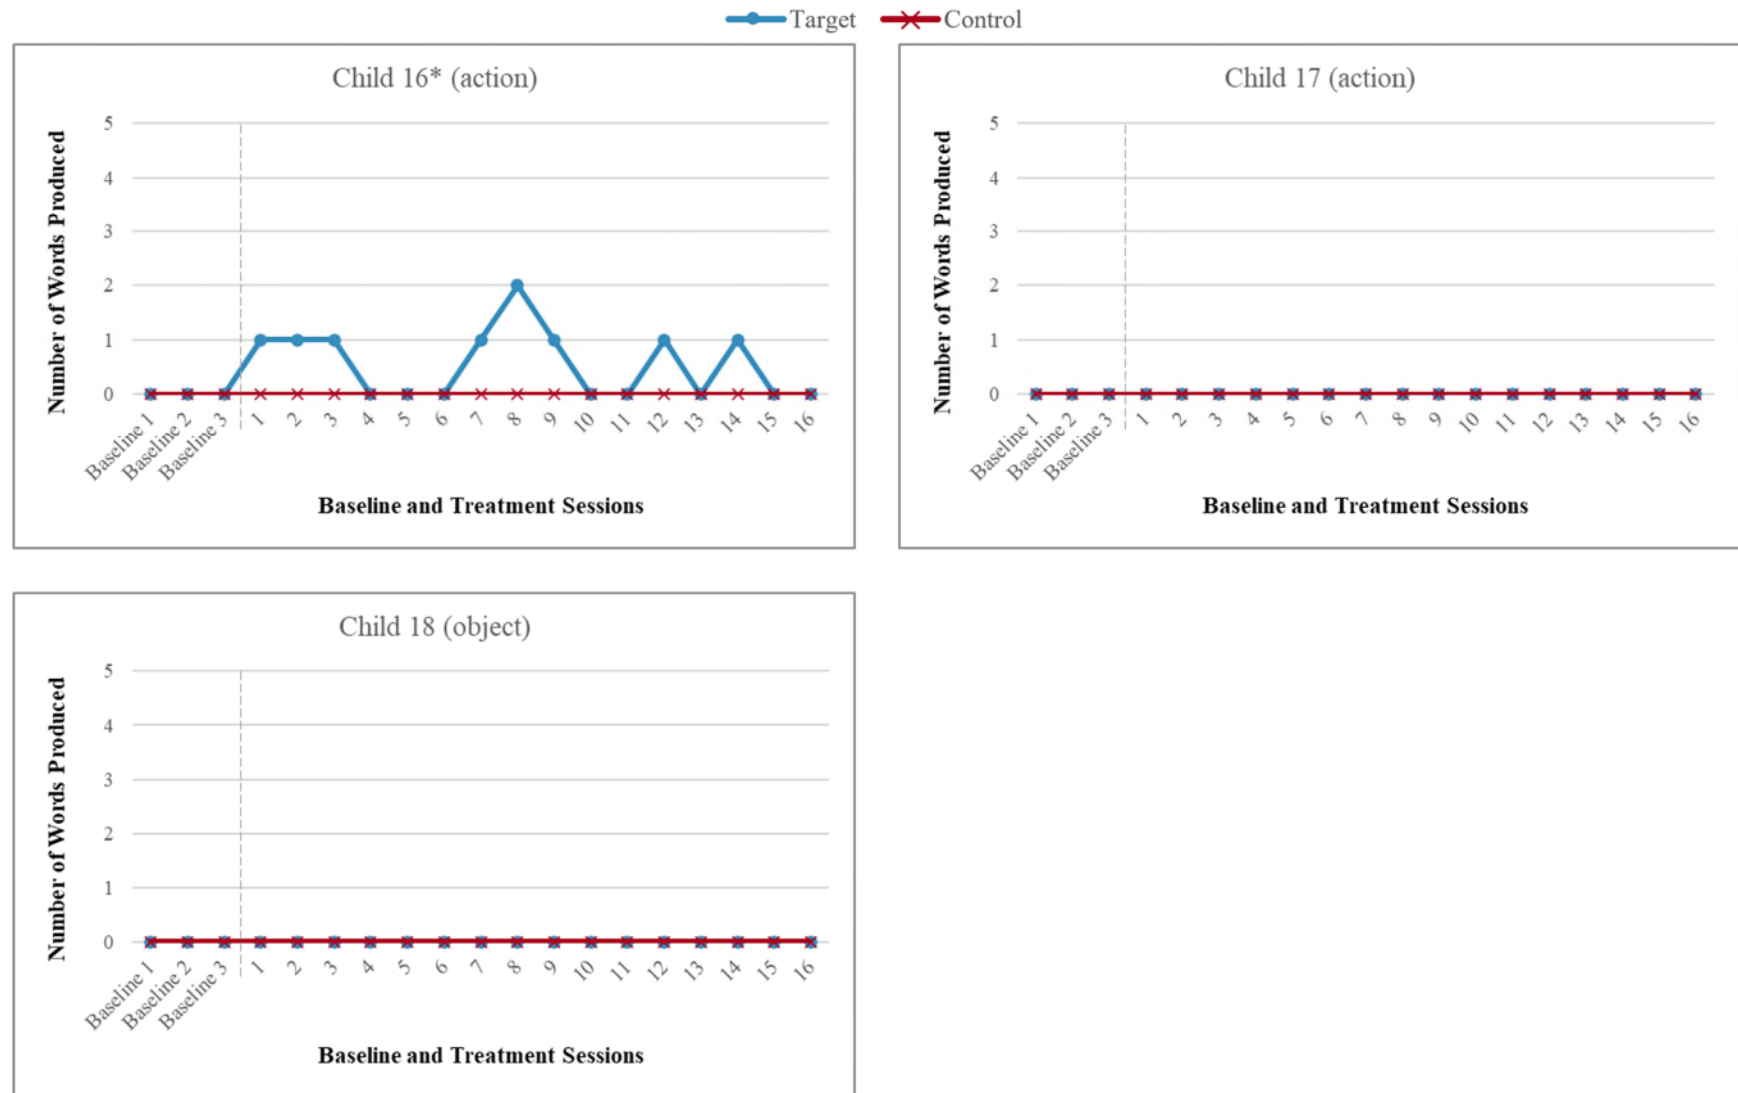

**Responder status** not available due to no post-treatment MCDI:

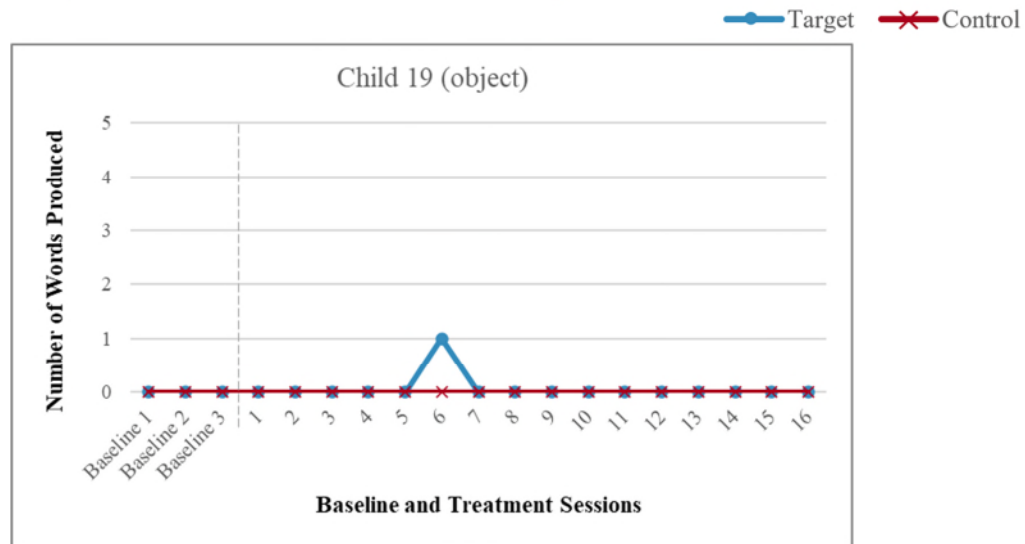

Supplement: Supplementary file 2 [file 1]
