# Supplementary material
Source: publisher figshare collection journal article supplement (https://asha.figshare.com/articles/dataset/_/28200074)
Supplement: Supplementary file 3 [file 1]

**Supplemental Material S2.** Details of analysis plan.

**Source:** Data are available on LDBase (<https://ldbase.org/>)

**Project Name:** A Longitudinal Assessment of Late Talking Toddlers  
(doi: 10.33009/ldbase.1722366228.775f)

**Dataset Relevant to this analysis:** Longitudinal Assessment of Late Talking Toddlers: VAULT data

**Codebook Relevant to this analysis:** VAULT Data Codebook

**Subset of Participants Included:** vault\_phase; 3

We completed our analysis using JASP software (JASP Team (2024); JASP (Version 0.19.0.0 [Computer software]. Below, we detail the specific steps we took in JASP and the parameters we specified for each type of analysis. We also provide an example of an R script that JASP creates, although we did not use R as our primary analytic method.

**Type of Analysis:** Bayesian Independent Samples *t*-test

*Used for Assessing:* Effect of treatment condition on treatment effect size

| Select in JASP                                       | R script as generated by JASP                                                                                                                                                                             |
|------------------------------------------------------|-----------------------------------------------------------------------------------------------------------------------------------------------------------------------------------------------------------|
| T-Tests; Bayesian; Independent Samples T-Test        | jaspTTests::TTestBayesianIndependentSamples(<br>version = "0.19",<br>formula = ~ `target_dscore`,<br>group = list(types = "nominal", value =<br>"vault_studycondition"),<br>priorAndPosteriorPlot = TRUE) |
| Dependent Variable: target_dscore                    |                                                                                                                                                                                                           |
| Grouping Variable: vault_studycondition              |                                                                                                                                                                                                           |
| Alternative Hypothesis Group 1 ≠ Group 2             |                                                                                                                                                                                                           |
| Bayes Factor BF10                                    |                                                                                                                                                                                                           |
| Tests: Student                                       |                                                                                                                                                                                                           |
| Missing Values: Exclude cases per dependent variable |                                                                                                                                                                                                           |
| Priors: Default; Cauchy scale 0.707                  |                                                                                                                                                                                                           |
| Plots: Prior and posterior                           |                                                                                                                                                                                                           |

*Used for Assessing:* Effect of treatment condition on receptive probes

| Select in JASP                                        | R script as generated by JASP                                                                                                                                                                                   |
|-------------------------------------------------------|-----------------------------------------------------------------------------------------------------------------------------------------------------------------------------------------------------------------|
| T-Tests; Bayesian; Independent Samples T-Test         | jaspTTests::TTestBayesianIndependentSamples(<br>version = "0.19",<br>formula = ~ `Receptive Target`,<br>group = list(types = "nominal", value = "<br>vault_studycondition " ),<br>priorAndPosteriorPlot = TRUE) |
| Dependent Variable: receptive_target (Post-Treatment) |                                                                                                                                                                                                                 |

|                                                      |  |
|------------------------------------------------------|--|
| Grouping Variable: vault_studycondition              |  |
| Alternative Hypothesis Group 1 $\neq$ Group 2        |  |
| Bayes Factor BF10                                    |  |
| Tests: Student                                       |  |
| Missing Values: Exclude cases per dependent variable |  |
| Priors: Default; Cauchy scale 0.707                  |  |
| Plots: Prior and posterior                           |  |

Note: This same analysis was repeated with the dependent variable as "receptive\_control"

### Type of Analysis: Bayesian Paired Samples *t*-test

*Used for Assessing:* Comparison of target and control effect sizes

| Select in JASP                                          | R script as generated by JASP                                                                                                                                                                               |
|---------------------------------------------------------|-------------------------------------------------------------------------------------------------------------------------------------------------------------------------------------------------------------|
| T-Tests; Bayesian; Paired Samples t-test                | <code>jasptTests::TTestBayesianPairedSamples(<br/>version = "0.19",<br/>alternative = "greater",<br/>pairs = list(list("target_dscore ", "<br/>control_dscore ")),<br/>priorAndPosteriorPlot = TRUE)</code> |
| Variable Pairs: target_dscore;<br>control_dscore        |                                                                                                                                                                                                             |
| Alternative Hypothesis: Measure 1 ><br>Measure 2        |                                                                                                                                                                                                             |
| Bayes Factor BF10                                       |                                                                                                                                                                                                             |
| Tests: Student                                          |                                                                                                                                                                                                             |
| Missing Values: Exclude cases per<br>dependent variable |                                                                                                                                                                                                             |
| Priors: Default; Cauchy scale 0.707                     |                                                                                                                                                                                                             |
| Plots: Prior and posterior                              |                                                                                                                                                                                                             |

*Used for Assessing:* MCDI growth rate during treatment compared to follow up.

| Select in JASP                                                            | R script as generated by JASP                                                                                                                                                                          |
|---------------------------------------------------------------------------|--------------------------------------------------------------------------------------------------------------------------------------------------------------------------------------------------------|
| T-Tests; Bayesian; Paired Samples t-test                                  | <code>jasptTests::TTestBayesianPairedSamples(<br/>version = "0.19",<br/>pairs = list(list("rate_words_learned", "<br/>rate_posttreatment_followup_calc_e ")),<br/>priorAndPosteriorPlot = TRUE)</code> |
| Variable Pairs: rate_words_learned;<br>rate_posttreatment_followup_calc_e |                                                                                                                                                                                                        |
| Alternative Hypothesis: Measure 1 $\neq$<br>Measure 2                     |                                                                                                                                                                                                        |

|                                                      |  |
|------------------------------------------------------|--|
| Bayes Factor BF10                                    |  |
| Tests: Student                                       |  |
| Missing Values: Exclude cases per dependent variable |  |
| Priors: Default; Cauchy scale 0.707                  |  |
| Plots: Prior and posterior                           |  |

*Used for Assessing:* Receptive Probes for targets v. controls, post-treatment

| Select in JASP                                                                   | R script as generated by JASP                                                                                                                                                                                  |
|----------------------------------------------------------------------------------|----------------------------------------------------------------------------------------------------------------------------------------------------------------------------------------------------------------|
| T-Tests; Bayesian; Paired Samples t-test                                         | <code>jaspTTests::TTestBayesianPairedSamples(<br/>version = "0.19",<br/>alternative = "greater",<br/>pairs = list(list("receptive_target",<br/>"receptive_control")),<br/>priorAndPosteriorPlot = TRUE)</code> |
| Variable Pairs: receptive_target;<br>receptive_control<br>Select: Post-treatment |                                                                                                                                                                                                                |
| Alternative Hypothesis: Measure 1 ><br>Measure 2                                 |                                                                                                                                                                                                                |
| Bayes Factor BF+0                                                                |                                                                                                                                                                                                                |
| Tests: Student                                                                   |                                                                                                                                                                                                                |
| Missing Values: Exclude cases per dependent variable                             |                                                                                                                                                                                                                |
| Priors: Default; Cauchy scale 0.707                                              |                                                                                                                                                                                                                |
| Plots: Prior and posterior                                                       |                                                                                                                                                                                                                |

*Used for Assessing:* Receptive Probes for targets post-treatment v. follow-up

| Select in JASP                                                                                              | R script as generated by JASP                                                                                                                                                                                                                    |
|-------------------------------------------------------------------------------------------------------------|--------------------------------------------------------------------------------------------------------------------------------------------------------------------------------------------------------------------------------------------------|
| T-Tests; Bayesian; Paired Samples t-test                                                                    | <code>jaspTTests::TTestBayesianPairedSamples(<br/>version = "0.19",<br/>alternative = "greater",<br/>pairs =<br/>list(list("post_treatment_receptive_target",<br/>"post_treatment_receptive_control")),<br/>priorAndPosteriorPlot = TRUE)</code> |
| Variable Pairs:<br>post_treatment_receptive_target;<br>follow_up_receptive_target<br>Select: Post-treatment |                                                                                                                                                                                                                                                  |
| Alternative Hypothesis: Measure 1 ≠<br>Measure 2                                                            |                                                                                                                                                                                                                                                  |
| Bayes Factor BF+0                                                                                           |                                                                                                                                                                                                                                                  |

|                                                      |  |
|------------------------------------------------------|--|
| Tests: Student                                       |  |
| Missing Values: Exclude cases per dependent variable |  |
| Priors: Default; Cauchy scale 0.707                  |  |
| Plots: Prior and posterior                           |  |

Note: The same analysis was run for control words, substituting 'control' for 'target'.

### Type of Analysis: Bayesian repeated measure ANOVA

*Used for Assessing:* MCDI growth rates during delay v. during treatment by condition.

| Select in JASP                                                           | R script as generated by JASP                                                                                                                                                                                                                                                                                                                                                                                                                                                                                                                                                                                                                                                                                                                                                                                                                                                                                                                                                                                                                                                                                                                                                                      |
|--------------------------------------------------------------------------|----------------------------------------------------------------------------------------------------------------------------------------------------------------------------------------------------------------------------------------------------------------------------------------------------------------------------------------------------------------------------------------------------------------------------------------------------------------------------------------------------------------------------------------------------------------------------------------------------------------------------------------------------------------------------------------------------------------------------------------------------------------------------------------------------------------------------------------------------------------------------------------------------------------------------------------------------------------------------------------------------------------------------------------------------------------------------------------------------------------------------------------------------------------------------------------------------|
| ANOVA; Bayesian; Repeated Measures ANOVA                                 | jaspAnova::AnovaRepeatedMeasuresBayesian(<br>version = "0.19",                                                                                                                                                                                                                                                                                                                                                                                                                                                                                                                                                                                                                                                                                                                                                                                                                                                                                                                                                                                                                                                                                                                                     |
| Repeated Measures Factors: TIME: Delay;<br>Treatment                     | barPlotHorizontalAxis = list(types = list(), value = "" ),<br>barPlotSeparatePlots = list(types = list(), value = "" ),<br>betweenSubjectFactors = list(types = "nominal", value = "vault_studycondition"),<br>customPriorSpecification = list(types = list("unknown", "nominal", "unknown"), value = list(list(components = "TIME", inclusionProbability = 0.5, scaleFixedEffects = 0.5), list(components = " vault_studycondition ", inclusionProbability = 0.5, scaleFixedEffects = 0.5), list(components = list("TIME", " vault_studycondition "), inclusionProbability = 0.5, scaleFixedEffects = 0.5))),<br>descriptivePlotHorizontalAxis = list(types = list(), value = "" ),<br>descriptivePlotSeparateLines = list(types = list(), value = "" ),<br>descriptivePlotSeparatePlot = list(types = list(), value = "" ),<br>effects = TRUE,<br>modelTerms = list(types = list("unknown", "nominal", "unknown"), value = list(list(components = "TIME", isNuisance = FALSE), list(components = " vault_studycondition ", isNuisance = FALSE), list(components = list("TIME", " vault_studycondition "), isNuisance = FALSE))),<br>rainCloudHorizontalAxis = list(types = list(), value = "" ), |
| Repeated Measures Cells:<br>avg_words_week_mcdi_e;<br>rate_words_learned |                                                                                                                                                                                                                                                                                                                                                                                                                                                                                                                                                                                                                                                                                                                                                                                                                                                                                                                                                                                                                                                                                                                                                                                                    |

|                                                  |                                                                                                                                                                                                                                                                                                                                                           |
|--------------------------------------------------|-----------------------------------------------------------------------------------------------------------------------------------------------------------------------------------------------------------------------------------------------------------------------------------------------------------------------------------------------------------|
|                                                  | rainCloudSeparatePlots = list(types = list(),<br>value = ""),<br>repeatedMeasuresCells =<br>list("avg_words_week_mcdi_e", "<br>rate_words_learned"),<br>repeatedMeasuresFactors = list(list(levels =<br>list("Delay", "Tx"), name = "TIME")),<br>singleModelTerms = list("TIME", "<br>vault_studycondition ", list("TIME", "<br>vault_studycondition "))) |
| Between Subjects Factor:<br>vault_studycondition |                                                                                                                                                                                                                                                                                                                                                           |
| Bayes Factor: BF10                               |                                                                                                                                                                                                                                                                                                                                                           |
| Tables: Effects; Across all models               |                                                                                                                                                                                                                                                                                                                                                           |
| Order: Compare to best model                     |                                                                                                                                                                                                                                                                                                                                                           |
| Limit No. Models Shown: Yes, show best<br>10     |                                                                                                                                                                                                                                                                                                                                                           |
